# Supplementary material
Source: PubMed Central journal article supplement (PMC2671893)

**Supplemental Data:**

**Figure 3.**

**A. Total and phospho-PKC $\alpha$  in UtSM and UtLM cells.**

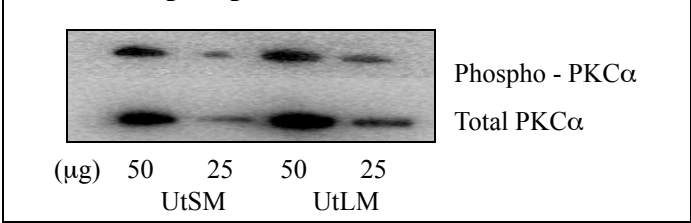

**B. Total Erk levels in UtSM and UtLM cells.**

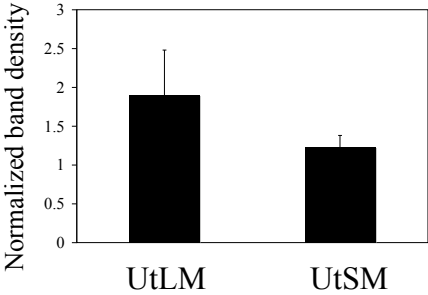

Supplement: en.2008-0224_3.pdf [file en.2008-0224_3.pdf]
