# Supplementary material
Source: PubMed Central journal article supplement (PMC2671893)

**Supplemental Data:**

**Figure 1. Activated caspase 3 in UtLM with E2 treatment.**

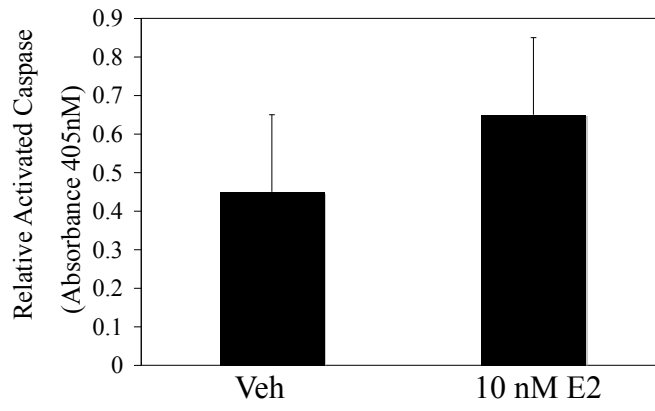

Supplement: en.2008-0224_1.pdf [file en.2008-0224_1.pdf]

## Supplemental Data

**Figure 2. Phospho-Erk Levels - UtLM**

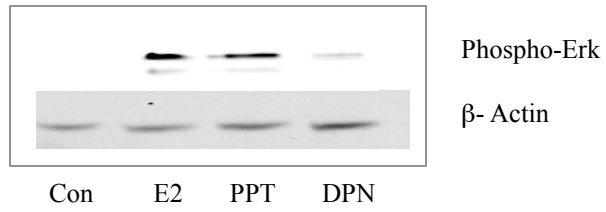

Supplement: en.2008-0224_2.pdf [file en.2008-0224_2.pdf]

## Supplemental Data

### Figure 4. ER $\alpha$ Expression

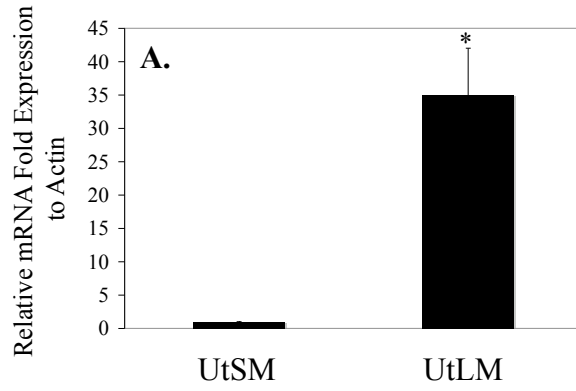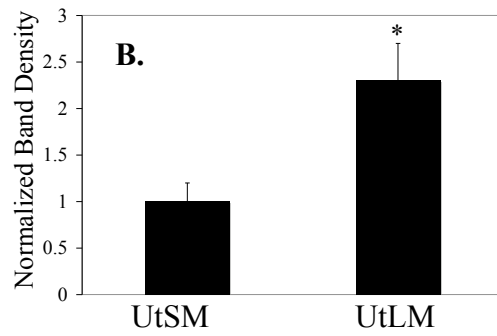

Supplement: en.2008-0224_4.pdf [file en.2008-0224_4.pdf]

## Supplemental Data

**Figure 5. PgR Expression with cAMP-PKA Inhibition - UtSM**

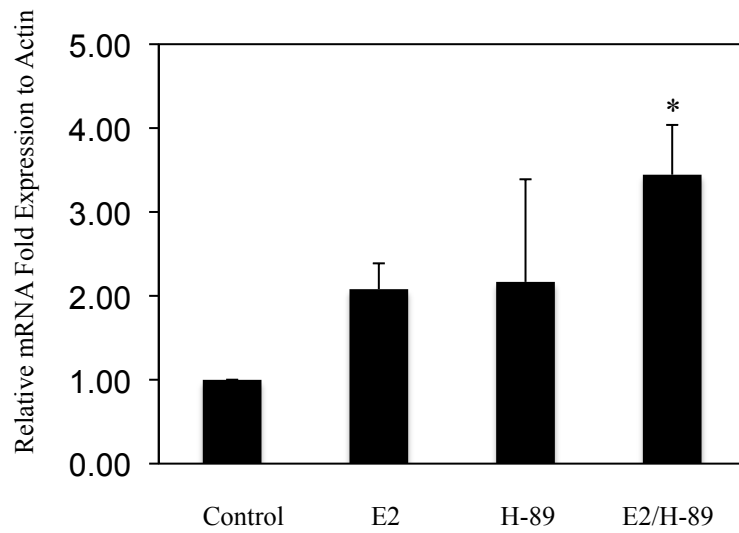

Supplement: en.2008-0224_5.pdf [file en.2008-0224_5.pdf]

**Supplemental Data:**

**Figure 6. Phospho-Mek levels with E2 treatment.**

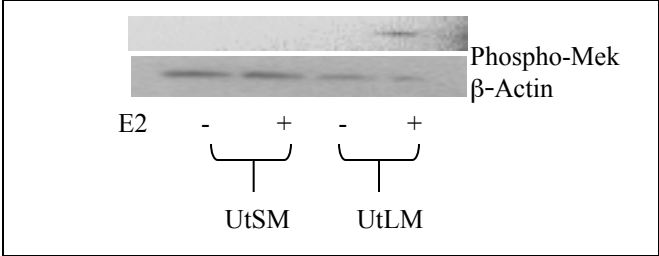

Supplement: en.2008-0224_6.pdf [file en.2008-0224_6.pdf]

**Supplemental Data:**

**Figure 7. Erk phosphorylation in UtSM cells**

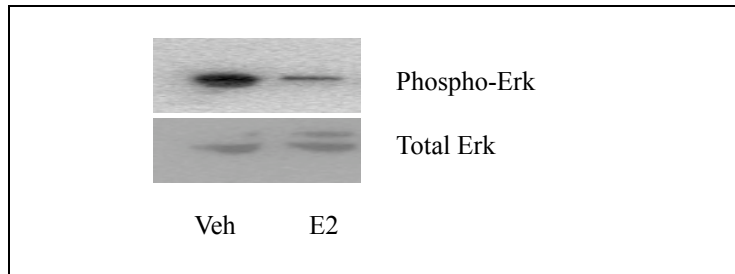

Supplement: en.2008-0224_7.pdf [file en.2008-0224_7.pdf]

## Supplemental Data

**Figure 8. Phospho-Erk Levels - UtSM**

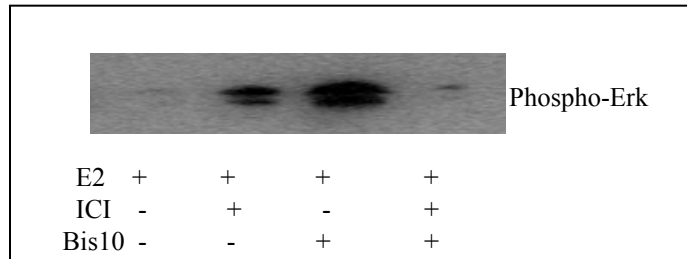

Supplement: en.2008-0224_8.pdf [file en.2008-0224_8.pdf]
